# Supplementary material
Source: PubMed Central journal article supplement (PMC8126997)
Supplement: NIHMS1692957-supplement-supplement.pdf [file NIHMS1692957-supplement-supplement.pdf]

# Supporting Information

## Inhibiting HTLV-1 Protease: A Viable Antiviral Target

*Gordon J. Lockbaum<sup>1</sup>, Mina Henes<sup>1</sup>, Nathaniel Talledge<sup>2</sup>, Linah N. Ruseri<sup>1</sup>, Klajdi Kosovrasti<sup>1</sup>, Ellen A. Nalivaika<sup>1</sup>, Mohan Somasundaran<sup>1</sup>, Akbar Ali<sup>1</sup>, Louis M. Mansky<sup>2</sup>, Nese Kurt Yilmaz<sup>1</sup>, Celia A. Schiffer<sup>1</sup>*

<sup>1</sup>Department of Biochemistry and Molecular Pharmacology, University of Massachusetts Medical School,  
Worcester, Massachusetts 01605, United States

<sup>2</sup>Institute for Molecular Virology, Masonic Cancer Center, University of Minnesota – Twin Cities, Minneapolis,  
Minnesota 55455, United States

## SUPPLEMENTARY FIGURES

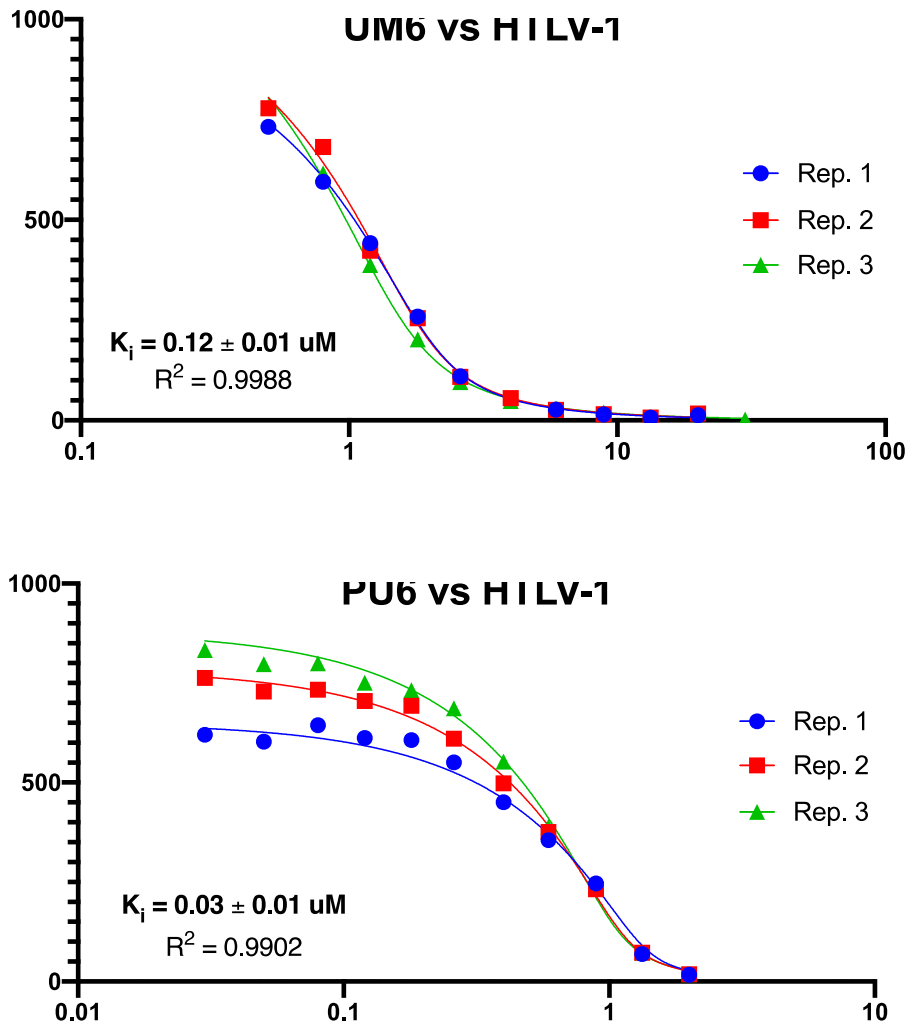

**Figure S1.** Representative dose-response curves. Initial velocity ( $V_i$ ) as a function of inhibitor concentration was globally fit for 3 replicates (Rep 1–3) to obtain the inhibition constants ( $K_i$ ).

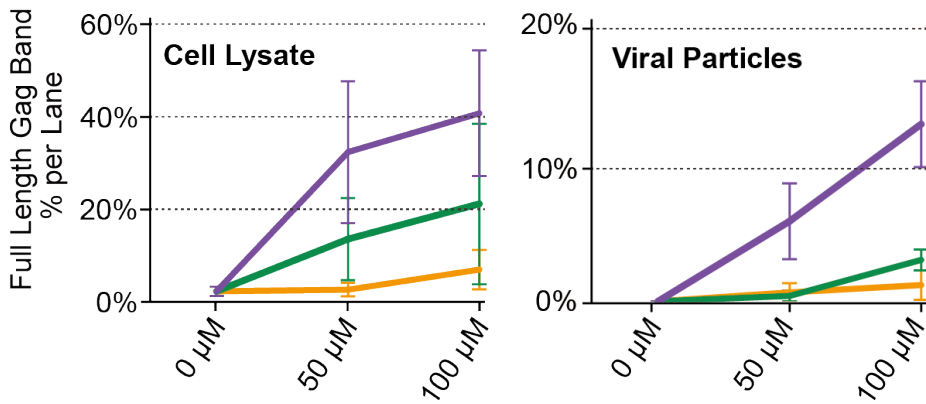

**Figure S2:** Immunoblot quantification of full-length (FL Gag) band as a percentage of total bands in each lane for the different SP cell drug treatments reported as the mean  $\pm$  SEM (n=3).

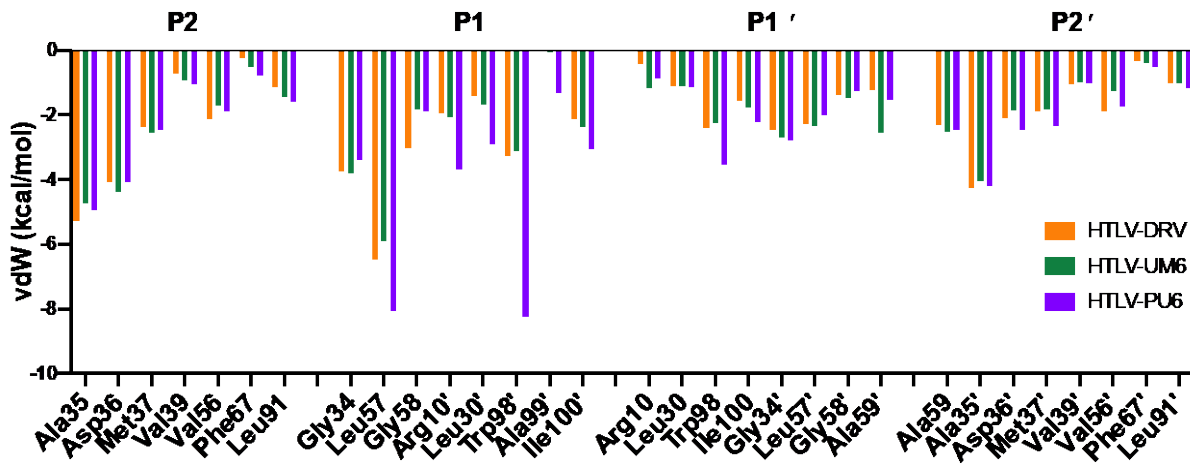

**Figure S3:** Per-residue vdW contacts between protease and inhibitor, grouped by inhibitor moiety.

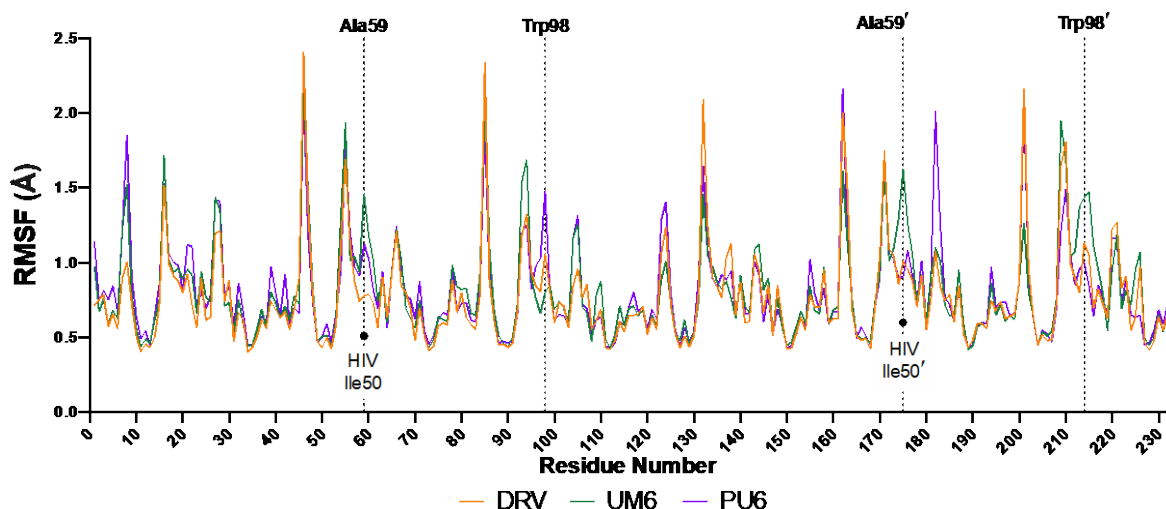

**Figure S4:** Root-Mean-Square Fluctuation (RMSF) of Ca atoms for DRV, UM6 and PU6 in complex with HTLV-1 protease from molecular dynamics simulations. Ala59/59' residues are at the tips of the flaps in HTLV-1 protease (corresponding to Ile50/50' in HIV-1 protease), and Trp98/98' are at the P1/P1' subsites of the active site.

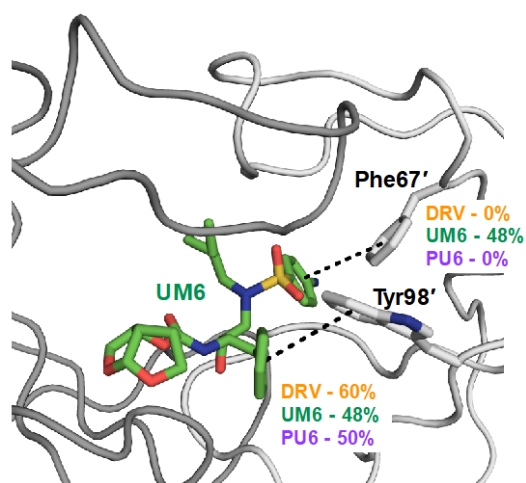

**Figure S5.** Aromatic side chains in HTLV-1 active site can form  $\pi$ - $\pi$  stacking interactions, primarily in edge-to-face configuration, with the P1 phenylalanine and P2' aniline of DRV analogs. Frequency of the  $\pi$ - $\pi$  stacking interactions (dashed lines) during MD simulations is indicated.

## SUPPLEMENTARY TABLES

**Table S1.** HIV-1 protease and HTLV-1 protease viral polyprotein cleavage sites.

| Cleavage Site | HIV-1<br>(P4-P1/P1'-P4') | HTLV-1<br>(P4-P1/P1'-P4') |
|---------------|--------------------------|---------------------------|
| MA/CA         | SQNY/PIVQ                | PQVL/PVMH                 |
| CA/NC         | -                        | TKVL/VVQP                 |
| Gag/PR        | SFNF/PQIT                | ASIL/PVIP                 |
| PR/Pol        | TLNF/PISP                | PVIL/PIQA                 |
| Pro/RT        | -                        | PAVL/GLEL                 |
| RT-RH/IN      | RKIL/FLDG                | VLQL/SPAD                 |

**Table S2.** Enzymatic activity of HTLV-1 protease measured using natural substrate sequences.

| Cleavage Site | Sequence<br>(P4-P1/P1'-P4') | $K_M$ ( $\mu\text{M}$ ) | $k_{\text{cat}}$ ( $\text{s}^{-1}$ ) | $k_{\text{cat}}/K_M$ ( $\mu\text{M}^{-1}\text{s}^{-1}$ ) |
|---------------|-----------------------------|-------------------------|--------------------------------------|----------------------------------------------------------|
| MA/CA         | PQVL/PVMH                   | $101.3 \pm 1.9$         | $21.6 \pm 0.1$                       | $0.21 \pm 0.02$                                          |
| CA/NC         | TKVL/VVQP                   | $31.6 \pm 5.9$          | $1.9 \pm 0.1$                        | $0.06 \pm 0.01$                                          |

**Table S3.** Inhibition constants ( $K_i$ ) against HTLV-1 protease.

| Inhibitor                  | 2D Structure | $K_i$ ( $\mu\text{M}$ )           |
|----------------------------|--------------|-----------------------------------|
| Indinavir<br>(IDV)         |              | $63 \pm 9$                        |
| <b>Darunavir<br/>(DRV)</b> |              | <b><math>0.8 \pm 0.1</math></b>   |
| UM1                        |              | $0.28 \pm 0.02$                   |
| <b>UM6</b>                 |              | <b><math>0.12 \pm 0.01</math></b> |
| UM7                        |              | $1.2 \pm 0.1$                     |
| UM8                        |              | $1.9 \pm 0.4$                     |
| UM9                        |              | $0.4 \pm 0.1$                     |
| <b>PU6</b>                 |              | <b><math>0.03 \pm 0.01</math></b> |

**Table S4.** X-ray data collection and crystallographic refinement statistics.

| Protease-Inhibitor                          | HTLV-DRV                     | HTLV-UM6                     | HTLV-PU6                     | HIV-PU6                                               |
|---------------------------------------------|------------------------------|------------------------------|------------------------------|-------------------------------------------------------|
| PDB ID                                      | 6W6Q                         | 6W6R                         | 6W6S                         | 6W6T                                                  |
| <b>Data Collection</b>                      |                              |                              |                              |                                                       |
| Space group                                 | <i>P</i> 6 <sub>3</sub> 22   | <i>P</i> 6 <sub>3</sub> 22   | <i>P</i> 6 <sub>3</sub> 22   | <i>P</i> 2 <sub>1</sub> 2 <sub>1</sub> 2 <sub>1</sub> |
| Cell dimensions:                            |                              |                              |                              |                                                       |
| <i>a</i> (Å)                                | 78.5                         | 77.9                         | 76.6                         | 51.1                                                  |
| <i>b</i> (Å)                                | 78.5                         | 77.9                         | 76.6                         | 58.0                                                  |
| <i>c</i> (Å)                                | 160.6                        | 160.1                        | 157.3                        | 61.7                                                  |
| <i>α, β, γ</i> (°)                          | 90, 90, 120                  | 90, 90, 120                  | 90, 90, 120                  | 90, 90, 90                                            |
| Resolution (Å)                              | 40.1 - 2.10<br>(2.18 - 2.10) | 41.9 - 2.05<br>(2.12 - 2.05) | 39.3 - 2.29<br>(2.37 - 2.29) | 21.9-1.84<br>(1.91-1.84)                              |
| Unique reflections                          | 17823 (1728)                 | 18768 (1804)                 | 12954 (1244)                 | 16226 (1420)                                          |
| Total reflections                           | 162887 (16621)               | 173500 (15456)               | 114508 (11155)               | 104007 (4828)                                         |
| <i>R</i> <sub>merge</sub> <sup>a</sup>      | 0.09 (2.00)                  | 0.10 (3.49)                  | 0.24 (3.89)                  | 0.06 (0.29)                                           |
| <i>R</i> <sub>pim</sub>                     | 0.03 (0.68)                  | 0.04 (1.25)                  | 0.09 (1.36)                  | -                                                     |
| CC1/2                                       | 1.00 (0.37)                  | 1.00 (0.23)                  | 0.99 (0.15)                  | -                                                     |
| CC*                                         | 1.00 (0.73)                  | 1.00 (0.62)                  | 1.00 (0.50)                  | -                                                     |
| Completeness (%)                            | 99.8 (100)                   | 99.8 (99.6)                  | 99.9 (99.9)                  | 98.4 (88.0)                                           |
| Redundancy                                  | 9.1 (9.6)                    | 9.2 (8.6)                    | 8.8 (9.0)                    | 6.4 (3.4)                                             |
| Average <i>I</i> / <i>σ</i>                 | 12.6 (1.2)                   | 12.2 (0.7)                   | 5.9 (0.9)                    | 22.7 (3.3)                                            |
| Wilson <i>B</i> -factors (Å <sup>2</sup> )  | 55.2                         | 50.6                         | 61.3                         | 25.2                                                  |
| <b>Refinement</b>                           |                              |                              |                              |                                                       |
| <i>R</i> <sub>factor</sub> (%) <sup>c</sup> | 22.9                         | 22.1                         | 26.6                         | 20.0                                                  |
| <i>R</i> <sub>free</sub> (%) <sup>d</sup>   | 26.2                         | 24.3                         | 30.5                         | 22.7                                                  |
| RMSD <sup>b</sup> in:                       |                              |                              |                              |                                                       |
| Bond lengths (Å)                            | 0.007                        | 0.012                        | 0.006                        | 0.003                                                 |
| Bond angles (°)                             | 0.81                         | 1.32                         | 0.82                         | 0.59                                                  |
| Ramachandran:                               |                              |                              |                              |                                                       |
| Favored                                     | 96.05                        | 96.49                        | 96.05                        | 99.48                                                 |
| Allowed                                     | 3.95                         | 3.07                         | 3.95                         | 0.52                                                  |
| Outliers                                    | 0.00                         | 0.44                         | 0.00                         | 0.00                                                  |

<sup>a</sup> $R_{\text{sym}} = \sum |I - \langle I \rangle| / \sum I$ , where *I* = observed intensity,  $\langle I \rangle$  = average intensity over symmetry equivalent; values in parentheses are for the highest resolution shell.

<sup>b</sup>RMSD, root mean square deviation.

<sup>c</sup> $R_{\text{factor}} = \sum ||F_o| - |F_c|| / \sum |F_o|$ .

<sup>d</sup> $R_{\text{free}}$  was calculated from 5% of reflections, chosen randomly, which were omitted from the refinement process.
